# Supplementary material for: LincRNAs MONC and MIR100HG act as oncogenes in acute megakaryoblastic leukemia
Source: PubMed Central journal article supplement (PMC4118279; doi:10.1186/1476-4598-13-171), 2014-07-15

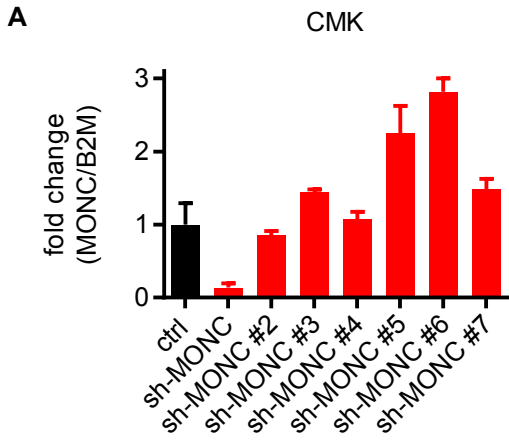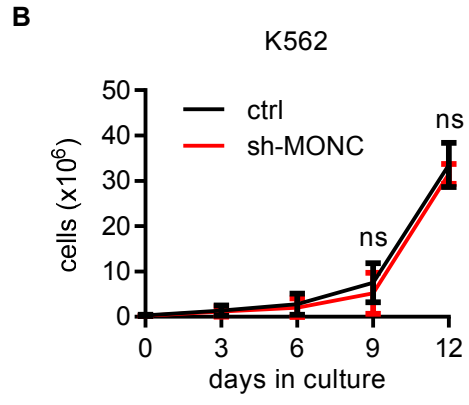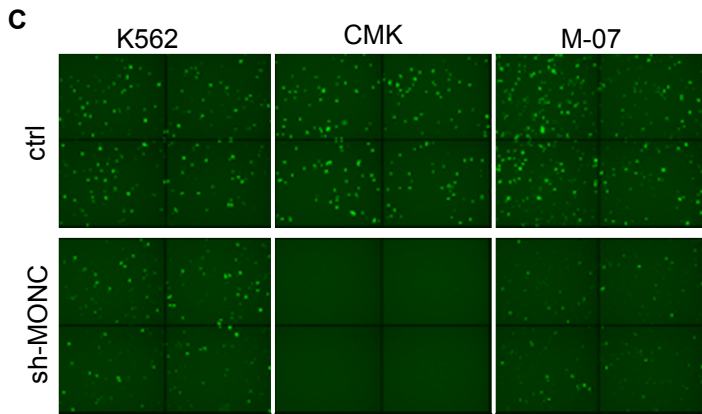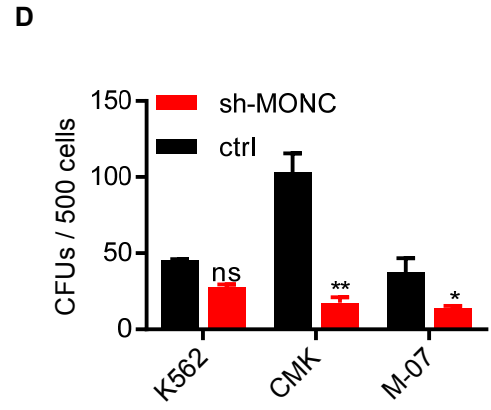

Supplement: 1476-4598-13-171-S2.pdf [file 1476-4598-13-171-S2.pdf]
